# Supplementary material for: CPR coaching during cardiac arrest improves adherence to PALS guidelines: a prospective, simulation-based trial
Source: PubMed Central journal article supplement — Resusc Plus. 2020 Dec 16;5:100058. doi: 10.1016/j.resplu.2020.100058 (PMC8244489; doi:10.1016/j.resplu.2020.100058), 2020-12-16
Supplement: mmc2.pdf [file mmc2.pdf]

# CLINICAL PERFORMANCE TOOL (CPT)

## T: 0 min

| Task        | 0 pts    | 1 pts                                                                      | 2 pts                                                                          |
|-------------|----------|----------------------------------------------------------------------------|--------------------------------------------------------------------------------|
| Pulse check | Not done | >10sec spent <b>OR</b><br>< 5sec spent <b>OR</b><br>Peripheral pulse check | 5 to 10 seconds <b>AND</b><br>Central pulse check (carotid, brachial, femoral) |

## T: 0 min AND 6 min AND 12 min

| Task                  | 0 pts    | 1 pts                                                                                                   | 2 pts                     |
|-----------------------|----------|---------------------------------------------------------------------------------------------------------|---------------------------|
| Rhythm Identification | Not done | Does not verbalize rhythm but demonstrates awareness of rhythm <b>OR</b><br>Verbalizes incorrect rhythm | Verbalizes correct rhythm |

## T: score once for every 2 minutes

| Task                  | 0 pts                                                                                                                                                                   | 1 pts                                                                                                                                                                                                                                                         | 2 pts                                                                                                                                                                                        |
|-----------------------|-------------------------------------------------------------------------------------------------------------------------------------------------------------------------|---------------------------------------------------------------------------------------------------------------------------------------------------------------------------------------------------------------------------------------------------------------|----------------------------------------------------------------------------------------------------------------------------------------------------------------------------------------------|
| CPR                   | Not done                                                                                                                                                                | Poor CPR technique:<br>- wrong hand position <b>OR</b><br>- improper rate <b>OR</b><br>- disruptions in CPR (≥10 sec)                                                                                                                                         | Good CPR technique                                                                                                                                                                           |
| Defibrillation        | <b>During VTach &amp; VFib:</b><br>- Not done <b>OR</b><br>- Shock in wrong mode (pacing or synch)<br><br><b>During PEA:</b> any shock delivered (including wrong mode) | <b>During VTach &amp; VFib:</b><br>- Wrong dose <b>OR</b><br>- Delayed administration (> 15sec following shockable rhythm assessment) <b>OR</b><br>- Too rapid re-administration (2 shocks delivered in 2min period)<br><br><b>During PEA:</b> no shock given | <b>During VTach &amp; VFib:</b><br>- 2-4 J/kg <b>AND</b><br>- 1 <sup>st</sup> defibrillation ≤ 15sec from shockable rhythm assessment<br>- Following defibrillation delivered in 2min period |
| Change in compressor  | No compressor switch during 2min phase                                                                                                                                  | >1 compressor switch during 2min phase                                                                                                                                                                                                                        | 1 compressor switch in 2min phase                                                                                                                                                            |
| Effective ventilation | Not done                                                                                                                                                                | Improper ventilation rate (15:2 or 6-8/min if intubated)                                                                                                                                                                                                      | Proper ventilation rate <b>AND</b> ratio (15:2 or 6-8/min if intubated)                                                                                                                      |

## T: score once for every 4 minutes

| Task        | 0 pts     | 1 pts                                                                                                                                                                                                                                      | 2 pts                                                                                                                                                                                                                                                             |
|-------------|-----------|--------------------------------------------------------------------------------------------------------------------------------------------------------------------------------------------------------------------------------------------|-------------------------------------------------------------------------------------------------------------------------------------------------------------------------------------------------------------------------------------------------------------------|
| Epinephrine | Not given | - Wrong dose <b>OR</b> dose not specified by team leader <b>OR</b><br>- Improper route (IM or ETT) <b>OR</b> delayed administration (> 5 min after previous dose) <b>OR</b><br>- Too rapid re-administration (< 3 min after previous dose) | - Correct dose and concentration verbalized - 10 ug/kg (or 0.01mg/kg or 0.1cc/kg) IV/IO of 1:10,000 or direction to use code sheet dosing <b>AND</b><br>- During ongoing arrest: repeated within 3 to 5 min <b>AND</b><br>- Given following second defibrillation |

Rater's name: \_\_\_\_\_

Video number: \_\_\_\_\_

## Scores

| Time period         | 0-2 min | 2-4 min | 4-6 min | 6-8 min | 8-10 min | 10-12 min | 12-14 min | 14-16 min | 16-18 min |
|---------------------|---------|---------|---------|---------|----------|-----------|-----------|-----------|-----------|
| Pulse check         | /2      |         |         |         |          |           |           |           |           |
| Time period         | 0-2 min | 2-4 min | 4-6 min | 6-8 min | 8-10 min | 10-12 min | 12-14 min | 14-16 min | 16-18 min |
| Rhythm indentificat | /2      |         |         | /2      |          |           | /2        |           |           |
| Time period         | 0-2 min | 2-4 min | 4-6 min | 6-8 min | 8-10 min | 10-12 min | 12-14 min | 14-16 min | 16-18 min |
| CPR                 | /2      | /2      | /2      | /2      | /2       | /2        | /2        | /2        | /2        |
| Defibrillat         | /2      | /2      | /2      | /2      | /2       | /2        | /1        | /1        | /1        |
| Change compressor   | /2      | /2      | /2      | /2      | /2       | /2        | /2        | /2        | /2        |
| Ventilation         | /2      | /2      | /2      | /2      | /2       | /2        | /2        | /2        | /2        |
| Time period         | 0-2 min | 2-4 min | 4-6 min | 6-8 min | 8-10 min | 10-12 min | 12-14 min | 14-16 min | 16-18 min |
| Epinephrine         | /2      |         | /2      |         | /2       |           | /2        |           | /2        |
